# Supplementary material for: Enhanced catalytic ability of chitosan–Cu–Fe bimetal complex for the removal of dyes in aqueous solution
Source: Royal Society of Chemistry journal article supplement (doi:10.1039/c5ra14711e), 2015-01-01
Supplement: c5ra14711e1.pdf [file c5ra14711e1.pdf]

**Supporting Information**

**Enhanced catalytic ability of chitosan-Cu-Fe bimetal  
complex for the removal of dyes in aqueous solution**

Sadia Rashid <sup>a, b</sup>, Chensi Shen <sup>a, b, \*</sup>, Xiaoguang Chen <sup>a, b</sup>, Su Li <sup>a, b</sup>, Yanhong Chen <sup>a, b</sup>,

Yuezhong Wen <sup>c</sup>, Jianshe Liu <sup>a, b, \*</sup>

<sup>a</sup> *College of Environmental Science and Engineering, Donghua University,  
Shanghai 201620, China.*

<sup>b</sup> *State Environmental Protection Engineering Center for Pollution Treatment  
and Control in Textile Industry, 201620, China.*

<sup>c</sup> *Institute of Environmental Science, Zhejiang University, Hangzhou 310058,  
China.*

---

\* Corresponding author: Tel: +86-21-6779-2548; Fax: +86-21-67792523.

E-mail address: shencs@dhu.edu.cn (C. S. Shen); liujianshe@dhu.edu.cn (J. S. Liu)

## 1 **Text S1. Preparation of Chitosan-Cu and Chitosan-Fe Complexes**

2 The preparation process of catalyst chitosan-Cu complex was done by modifying  
3 the literature procedure described by Kucherov and co-workers <sup>1</sup>. Chitosan (1 g) was  
4 slowly dissolved in 50 mL water containing 0.4 mL acetic acid at room temperature  
5 and stirred until chitosan was dissolved. Then, 50 mL of 0.1 mol/L CuSO<sub>4</sub>·5H<sub>2</sub>O was  
6 added into the dissolved chitosan. The mixture was stirred for 30 min until resulting  
7 in the coagulation of chitosan-Cu into gel. The chitosan-Cu complex was repeatedly  
8 washed with water until neutral pH and dried at 80°C. Here after chitosan-Cu will be  
9 mentioned as CS-Cu for simplicity's sake.

10 Chitosan-Fe complex was prepared by modifying the literature procedure <sup>2</sup>.  
11 Chitosan powder (1.0 g) was dissolved in 0.1 mol/L FeCl<sub>3</sub> aqueous solution (50 mL),  
12 and the mixture was stirred at room temperature for 4 h. Chitosan-Fe complex  
13 precipitation was obtained after the addition of ethanol and then the solid was washed  
14 with ethanol to remove an excess of FeCl<sub>3</sub> and finally dried at 80°C. It was then  
15 placed in ethanol solution containing 5% of glutaraldehyde for 12 h, according to the  
16 chemical crosslinking of chitosan with glutaraldehyde occurs by Schiff's reaction.  
17 From now on chitosan-Fe is referred as CS-Fe for the sake of simplicity.

18

## 19 **Text S2. Kinetic Models**

20 The pseudo-first-order rate model,

$$21 \quad \log(q_e - q_t) = \log q_e - \frac{k_1}{2.303} t \quad (1)$$

22 and the second-order rate model,

1 
$$\frac{t}{q_t} = \frac{1}{h} + \frac{1}{q_e}t, \quad h = k_2q_e^2, \quad (2)$$

2 where  $q_e$  and  $q_t$  are the amounts of dye adsorbed (mg/g) at equilibrium and at  
3 different intervals, respectively;  $k_1$  (1/min) and  $k_2$  (g/mg·min) are the pseudo-first-  
4 order and second-order rate constants; and  $h$  represents the initial adsorption rate  
5 (mg/g·min).

6

### 7 **Text S3. Isotherm Models**

8 The Langmuir isotherm was originally proposed to describe the adsorption of gas  
9 molecules onto metal surfaces. The model assumes uniform energy of the adsorption  
10 onto the surface and no migration of the adsorbate in the plane of the surface. It is  
11 expressed as

12 
$$q_e = \frac{abC_e}{1 + bC_e} \quad (3)$$

13 where  $q_e$  is the amount of dye adsorbed at equilibrium (mg/g) and  $C_e$  is the  
14 adsorbate concentration at equilibrium in aqueous solution (mg/L). The Langmuir  
15 isotherm parameters are  $a$  and  $b$ . The capacity of the adsorbent can be evaluated by  $a$ ,  
16 and the parameter  $b$  includes various physical constants.

17 The Freundlich isotherm describes heterogeneous systems on the surfaces with  
18 non-energetically equivalent sites. The equation can be written as follows:

19 
$$q_e = K_f C_e^{1/n} \quad (4)$$

20 where  $K_f$  is the Freundlich constant, which is indicative of the extent of  
21 adsorption, and  $1/n$  is the heterogeneity factor, an indicator of adsorption  
22 effectiveness.

1 Another useful equation is the Langmuir-Freundlich isotherm, which is based on  
2 the generalized Langmuir and generalized exponential isotherms and is the most  
3 promising extension of the Langmuir and Freundlich isotherms. It is expressed as

$$4 \quad q_e = \frac{q_m (K_{lf} C_e)^{1/v}}{1 + (K_{lf} C_e)^v} \quad (5)$$

5 where  $q_m$  is the maximum adsorption (mg/g),  $K_{lf}$  is the Langmuir-Freundlich  
6 constant  $(L/mg)^{1/v}$ , and  $v$  is the Langmuir-Freundlich heterogeneity constant. The  
7 Langmuir-Freundlich isotherm is essentially the Freundlich isotherm approaching a  
8 maximum at high concentrations.

9

## 10 **Literature Cited**

- 11 1. A. V. Kucherov, N. V. Kramareva, E. D. Finashina, A. E. Koklin and L. M.  
12 Kustov, *J. Mol. Catal. A-chem.*, 2003, **198**, 377-389.
- 13 2. R. B. Hernandez, A. P. Franc, O. R. Yola, A. Lopez-Delgado, J. Felcman, M.  
14 A. L. Recio and A. L. R. Merce, *J. Mol. Struct.*, 2008, **877**, 89-99.

15

16

17

18

19

20

21

1 **Table S1.** Parameters of kinetic study for dyes adsorption onto chitosan-Cu-Fe

2 complex.

| Adsorbent  | Initial<br>Concentration<br>(mg/L) | Pseudo first-order equation |                  |        | Pseudo second-order equation |                     |        |
|------------|------------------------------------|-----------------------------|------------------|--------|------------------------------|---------------------|--------|
|            |                                    | $q_e$<br>(mg/g)             | $K_1$<br>(1/min) | $R^2$  | $q_e$<br>(mg/g)              | $K_2$<br>(g/mg·min) | $R^2$  |
| CS-Cu-Fe-1 | 50                                 | 39.45                       | 0.29             | 0.9731 | 53.79                        | 0.01                | 0.9731 |
|            | 100                                | 83.07                       | 0.93             | 0.9697 | 96.85                        | 0.02                | 0.9981 |
|            | 200                                | 115.19                      | 0.58             | 0.9229 | 125.62                       | 0.004               | 0.9843 |
|            | 300                                | 193.89                      | 0.38             | 0.9687 | 291.97                       | 0.001               | 0.9859 |

3
